# Supplementary material for: A combined Terra/Aqua MODIS snow-cover and RGI6.0 glacier product (MOYDGL06*) for the High Mountain Asia between 2002 and 2018
Source: Copernicus journal article supplement (doi:10.5194/essd-2019-78), 2019-06-07
Supplement: Supplementary file [file essd-2019-78-AC2-supplement.pdf]

SC2

Li, X., Jing, Y., Shen, H. and Zhang, L.: The recent developments in spatio-temporally continuous snow cover product generation, Hydrol. Earth Syst. Sci. Discuss., (February), 1–28, doi:10.5194/hess-2018-633, 2019a. The above reference should be updated, because it has been accepted and published by HESS.

Li, X., Jing, Y., Shen, H. and Zhang, L., 2019. The recent developments in cloud removal approaches of MODIS snow cover product. Hydrology and Earth System Sciences, 23(5): 2401-2416.

Response: We thank the author of above paper for updating us about the final version publication. The reference is updated as above.
